# Supplementary material
Source: Royal Society of Chemistry journal article supplement (doi:10.1039/d6nj01432a)
Supplement: d6nj01432a1.pdf [file d6nj01432a1.pdf]

## **Bi-Modified V<sub>2</sub>C MXene Monolayer Film as Anode for Alkali Metal Ion (Li/Na) Batteries: A First-Principles Study**

Minghui Tan <sup>a, b</sup>, Jinping Zhang <sup>b, \*</sup>, Shan Yuan <sup>a, b</sup>, Fei Wang <sup>b</sup>, Xinli Li <sup>a, \*</sup>, Lei Shi <sup>c</sup>

*<sup>a)</sup> School of Materials Science and Engineering, Henan University of Science and Technology,  
Luoyang 471023, China*

*<sup>b)</sup> Faculty of Engineering, Huanghe Science and Technology College, Zhengzhou 450006, China*

*<sup>c)</sup> Henan Zhongfu Industrial Co., Ltd., Gongyi, 452100, China*

---

\* Corresponding Author.

E-mail address: [jpzhang@hhstu.edu.cn](mailto:jpzhang@hhstu.edu.cn); [lily2012@haust.edu.cn](mailto:lily2012@haust.edu.cn)

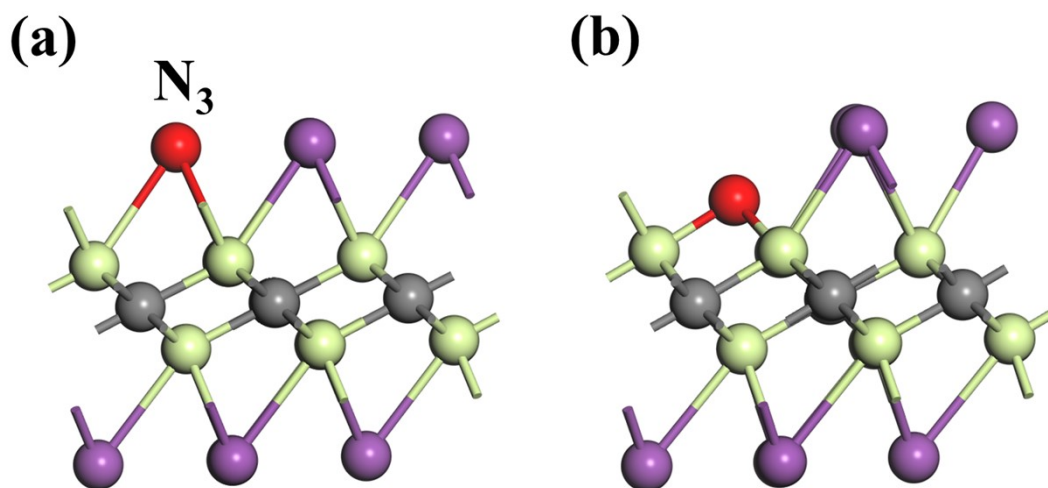

Fig.S1 Side view of O atoms doped at  $N_3$  site of  $V_2CBI_2$  before(a) and after optimization(b).

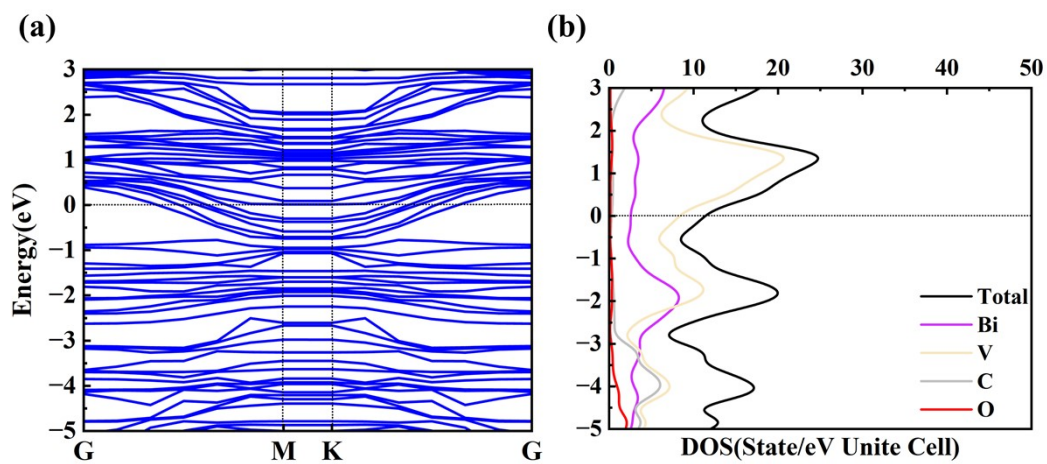

Fig.S2 Band structure (a) and density of states (b) of O-doped  $V_2CBI_2$

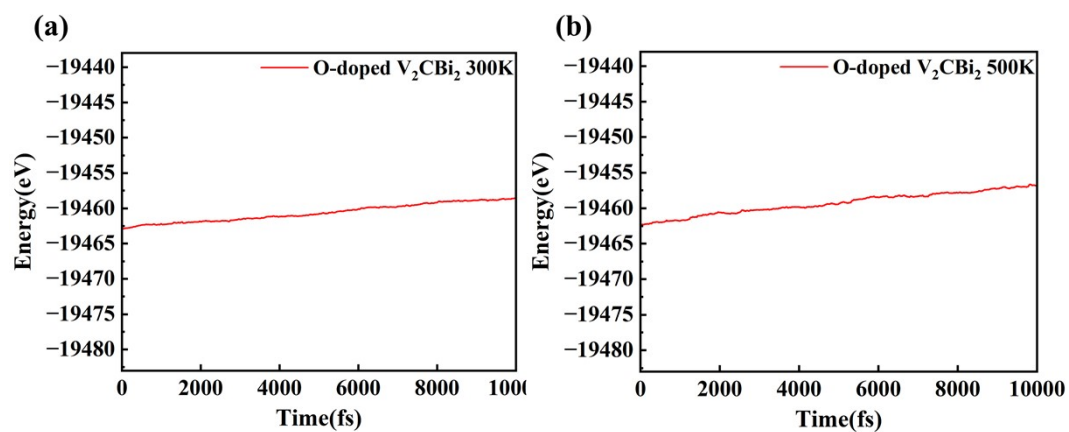

Fig.S3 Evolution of free energy of O-doped  $V_2CBI_2$  in AIMD calculations at 300 K (a) and at 500 K (b) during the time scale of 1 fs.

**Table S1.** Elastic constants (N/m) of  $V_2CBI_2$  monolayer.

|            | $C_{11}$ (N/m) | $C_{22}$ (N/m) | $C_{12}$ (N/m) | $C_{66}$ (N/m) |
|------------|----------------|----------------|----------------|----------------|
| $V_2CBI_2$ | 189.22         | 181.788        | 80.408         | 52.277         |

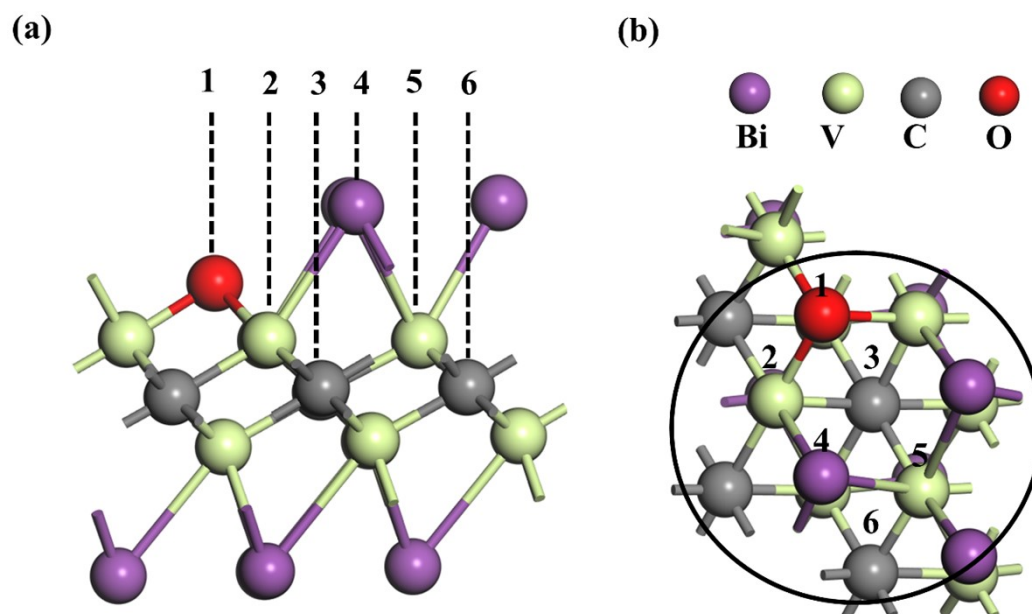**Fig.S4** Side view (a) and top view (b) of the six possible adsorption sites at O-doped  $V_2CBI_2$  monolayer.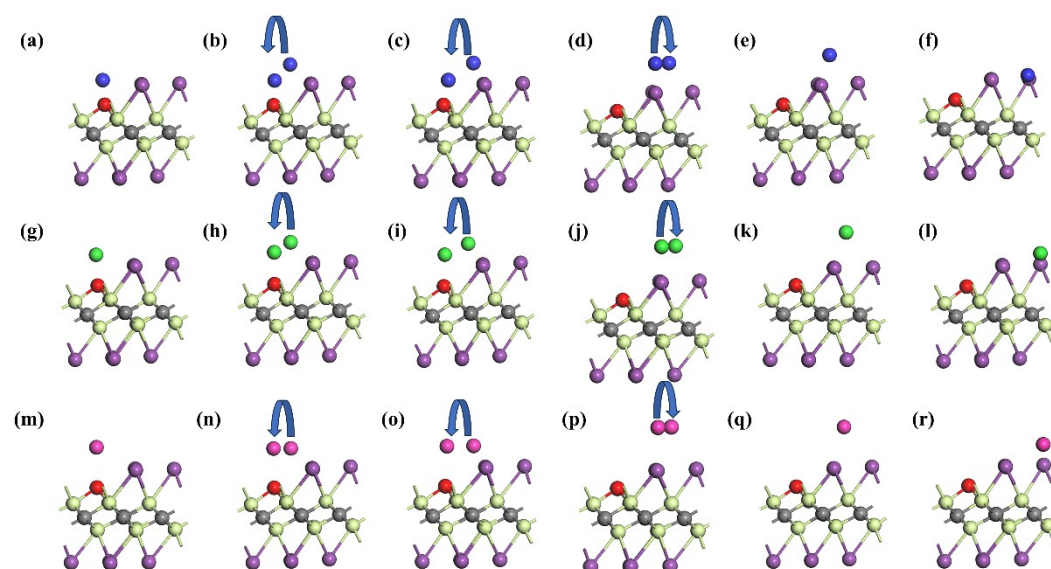**Fig.S5** Side view of Li(a-f), Na(g-l) and K(m-r) atoms adsorbed at six different sites (1, 2, 3, 4, 5, 6) of O-doped  $V_2CBI_2$  respectively after optimization.**Table S2.** The adsorption energies of Li/Na/K at different sites on O-doped  $V_2CBI_2$ .

| Sites | Adsorbate & Eads(eV) |       |       |
|-------|----------------------|-------|-------|
|       | Li                   | Na    | K     |
| 1     | -3.52                | -2.92 | -2.58 |
| 2     | -3.52                | -2.92 | -2.58 |
| 3     | -3.52                | -2.92 | -2.58 |

|   |       |       |       |
|---|-------|-------|-------|
| 4 | -2.13 | -1.55 | -1.54 |
| 5 | -2.13 | -1.55 | -1.54 |
| 6 | -3.12 | -2.50 | -2.37 |

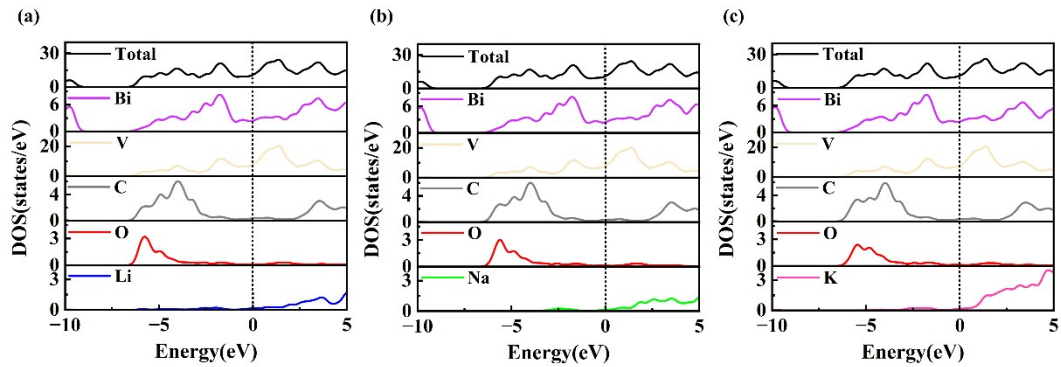

**Fig.S6.** Total and projected density of states for Li/Na/K adsorbed on O-doped  $V_2CBI_2$ .

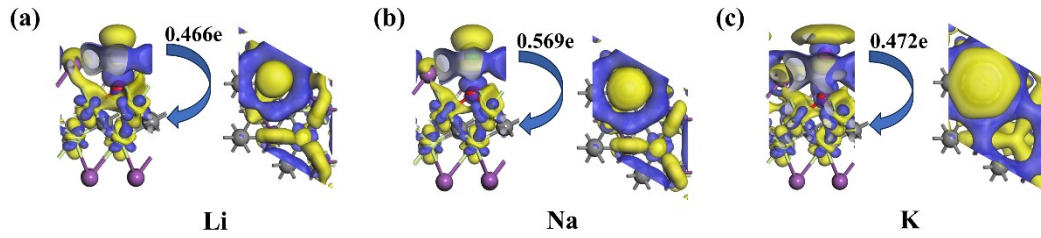

**Fig.S7.** The charge density difference (CDD) and Mulliken charge for Li, Na, K, ions adsorbed at 1 site on the O-doped  $V_2CBI_2$  (a-c).

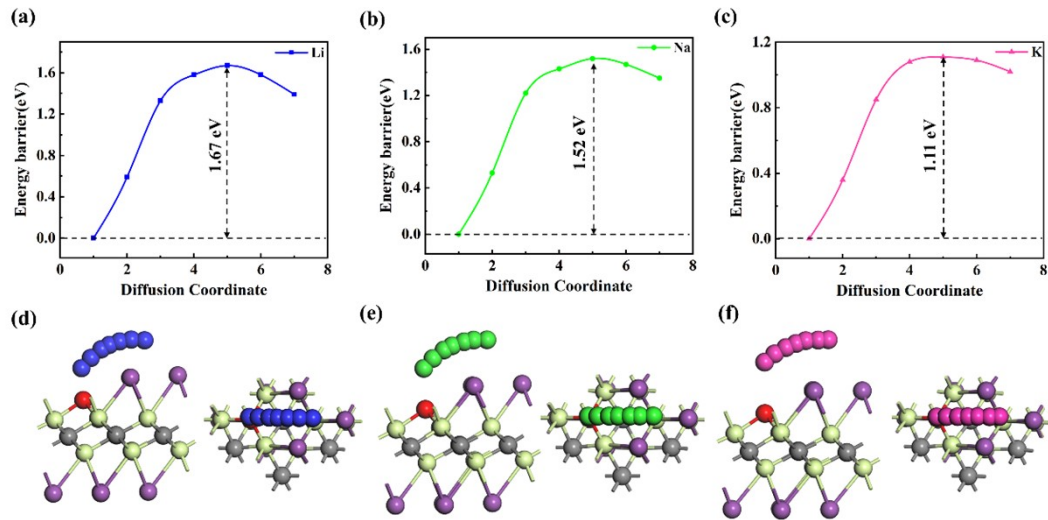

**Fig.S8.** The diffusion barriers (a-c) and diffusion path (d-f) for Li/Na/K atoms on O-doped  $V_2CBI_2$ .
